# Supplementary material
Source: publisher figshare collection journal article supplement (https://tandf.figshare.com/ndownloader/files/38311605)
Supplement: Supplementary file 1 [file 38311605]

**Appendix 3**

25-point check-list based marking scheme used for the assessment of psychomotor performance.

| **Category** | **Specific marking point** |  | **Score** |
| --- | --- | --- | --- |
| **Patient preparation** | 1. **One arm’s length** apart |  | /5 |
| 1. **Same** eye level |  |
| 1. Covers the eye with **palm** |  |
| 1. **Fixates** on the examiner’s eye |  |
| 1. **Remind** the patient to **re-fixate after blinking.** |  |
|  | | | |
| **Central vision** | 1. **Asks** if any **part(s) of the examiner’s face** is missing or not clear. |  | /2 |
| 1. Tests with **counting fingers** |  |
|  | | | |
| **Paracentral vision** | 1. Tests with **counting fingers** |  | /2 |
| 1. Tests all **4 quadrants** |  |
|  | | | |
| **Peripheral vision** | 1. **Clear instructions** for exam steps. (“to report when that the target first appears”) |  | /4 |
| 1. Tests with **finger wriggling** |  |
| 1. Tests all **4 quadrants** |  |
| 1. **Advances the target correctly**: diagonally from periphery inwards, start with fully outstretched arm. |  |
|  | | | |
| **Red hat pin testing** | 1. Check if the patient **can** **see the pin centrally**. |  | /4 |
| 1. **Clear instructions** for exam steps. (“to report when that the target first appears”) |  |
| 1. Tests all **4 quadrants** |  |
| 1. **Advances the target correctly**: diagonally from periphery inwards, start with fully outstretched arm. |  |
|  | | | |
| **Blind spot** | 1. Tests with a **red hat pin** |  | /4 |
| 1. **Clear instructions** for exam steps. (“to report when that the target first appear, disappears & reappears”) |  |
| 1. **Advances the target correctly**: Temporally to center along horizontal meridian. |  |
| 1. **Map out the blind spot** in 4 directions. |  |
|  | | | |
| **Technique** | 1. Presents target **midway** |  | /2 |
| 1. **Does not cross** hands |  |
|  | | | |
| **Viva** | 1. What would you do if the patient is unable to count fingers? What next after counting fingers? | /1 | |
| 1. Which target is more sensitive for detecting peripheral field defect? | /1 | |
